PLoS Biology

2

**Cleaner wrasse pass the mark test. What are the implications for consciousness and self-awareness testing in animals?**

4

6

**Masanori Kohda<sup>1\*</sup>, Takashi Hotta<sup>1</sup>, Tomohiro Takeyama<sup>1,2</sup>, Satoshi Awata<sup>1</sup>, Hirokazu**

**8 Tanaka<sup>1,3</sup>, Jun-ya Asai<sup>1</sup>, L. Alex Jordan<sup>1,4\*</sup>**

10 <sup>1</sup> Laboratory of Animal Sociology, Department of Biology and Geosciences, Osaka City

University, Osaka, Japan. <sup>2</sup> Department of Biosphere-Geosphere Science, Okayama

12 University of Science, Okayama, Japan. <sup>3</sup> Institute of Ecology and Evolution, Department of

Behavioural Ecology, University of Bern, Hinterkappelen, Switzerland. <sup>4</sup> Department of

14 Collective Behaviour, Max Planck Institute for Ornithology, Konstanz, Germany.

16 **\*Corresponding authors: E-mail: [kohda.tanganyika@gmail.com](mailto:kohda.tanganyika@gmail.com),**

**[lyndonjordan@gmail.com](mailto:lyndonjordan@gmail.com)**

18

20 Short title: The mark test in fish

## Abstract

22

The ability to perceive and recognise a reflected mirror image as self (mirror self-recognition, MSR) is considered a hallmark of cognition across species. Although MSR has been reported in mammals and birds, it is not known to occur in any other major taxon. A factor potentially limiting the ability to test for MSR is that the established assay for MSR, the mark test, shows an interpretation bias towards animals with the dexterity (or limbs) required to touch a mark. Here, we show that the cleaner wrasse fish, *Labroides dimidiatus*, passes through all phases of the mark test: (i) social reactions towards the reflection, (ii) repeated idiosyncratic behaviours towards the mirror (contingency testing), and (iii) frequent observation of their reflection. When subsequently provided with a coloured tag, individuals attempt to remove the mark in the presence of a mirror but show no response towards transparent marks, or to coloured marks in the absence of a mirror. This remarkable finding presents a challenge to our interpretation of the mark test – do we accept that these behavioural responses in the mark test, which are taken as evidence of self-recognition in other species, mean that fish are self-aware? Or do we conclude that these behavioural patterns have a basis in a cognitive process other than self-recognition? If the former, what does this mean for our understanding of animal intelligence? If the latter, what does this mean for our application and interpretation of the mark test as a metric for animal cognitive abilities?

24  
26  
28  
30  
32  
34  
36  
38  
40

## 42 **Introduction**

The mark test, in which a coloured mark is placed on a test subject in a location that can only  
44 be viewed in a mirror reflection, is held as the benchmark behavioural assay for assessing  
whether an individual has the capacity for self-recognition [1,2]. In human infants,  
46 approximately 65% of individuals pass the mark test by 18 months of age by touching the  
mark with their hands while viewing their reflection [3], although some individuals pass earlier  
48 and some never pass. Accumulating reports claim that many other animal species also pass  
the mark test, including chimpanzees [1], elephants [4], dolphins [5,6] and corvids [7], while  
50 many other species are apparently unable to pass the test [8; but see 9-11]. Nevertheless,  
the interpretation of these results is subject to wide debate, and the certainty with which  
52 behavioural responses during the mirror test can be taken as evidence of self-awareness in  
these animals is questioned (8,12,13). This problem is exacerbated when the taxonomic  
54 distance increases between the test species and taxa for which the test was initially  
designed. Can for example the behavioural results recorded for primates during the mirror  
56 test be meaningfully compared with those in birds? If yes, does this mean a bird that passes  
the mirror test is self-aware? More generally, if we are interested in understanding and  
58 comparing cognition and problem-solving across taxa, can we assume that equivalent  
behaviours represent equivalent underlying cognitive processes? With particular reference to  
60 the mark test, here we explore what forms of behaviour in fish could be taken as evidence of  
self-awareness, as has been done for primates and other taxa.

62

Given that the mark test as designed for humans and primates relies on hand gestures  
64 toward the marked region and changes in facial expression, we also ask whether it is even  
possible to interpret the behaviour of 'lower' taxonomic groups during the mark test in the  
66 same way as for 'higher' taxa. If not, we must ask how useful the mark test is as a test for  
self-awareness in animals. To explore these questions, we here test whether a fish, the  
68 cleaner wrasse *Labroides dimidiatus*, displays behavioural responses that constitute passing

the mark test. We then ask what this may mean for our understanding of self-awareness in  
70 animals and our interpretation of the test itself.

72 To date, no taxon outside of birds and mammals has passed the mark test. This is despite  
many species in other vertebrate classes, such as fish, showing sophisticated cognitive  
74 capacities in other tasks [14-17], including transitive inference [18,19], episodic-like memory  
[20], playing [21], tool use [22,23], prediction of the behaviour of others by using one's own  
76 experience during coordinated hunting [24, 25], cooperating to warn about predators [26,27]  
and cooperative foraging [28]. These studies reveal that the perceptual and cognitive abilities  
78 of fish often match or exceed those of other vertebrates [15,17], and suggest the possibility  
that the cognitive skills of fish could more closely approach those found in humans and apes  
80 [14,16,17,24,28].

82 Nevertheless, it can be challenging to employ standardised cognitive tests across species  
when performance in the test depends on specific behavioural responses that are not  
84 present in all taxa. This may be considered the case for the mark test, which has been  
designed to suit the behavioural repertoire of humans and primates [1,2]. Animals that  
86 cannot directly touch the marks used in MSR tests, such as fish as well as dolphin, are  
therefore regarded as poor test candidates [2,5,29], making direct comparison of their  
88 cognitive capacities with those of other vertebrates challenging [30-33]. Although no mark  
tests were performed, behavioural observation of manta rays (Chondrichthyes) on exposure  
90 to a mirror suggests that these fish show self-directed behaviour toward their reflection [34],  
though these results are contested [35,36]. This controversy highlights the need to question  
92 what type of behavioural response would be taken as evidence of interacting with the mark in  
an animal with the morphology of a ray, and whether these behaviours may have an  
94 alternative function, e.g. in social communication. To make a comparison across taxa, one  
must carefully consider the inherent biology of the focal species, preferably choosing a  
96 species with perceptual abilities and a behavioural repertoire that i) allow it to respond to

coloured marks placed on the body (this is not a given when the sensory systems of animals  
98 differ so greatly) and ii) do so in a manner that can be interpreted by a human observer.

100 The cleaner wrasse, *Labroides dimidiatus*, is such a species, forming mutualistic  
relationships with larger client fish by feeding on visually detected ectoparasites living on the  
102 skin of the clients [37]. Therefore, the cleaner wrasse has sensory and cognitive systems that  
are well-equipped for visually detecting spots of unusual colour on the skin surface, as well  
104 as the behavioural repertoire required to respond to marks. This species is highly social,  
interacting with the same individuals repeatedly over long periods of time, and has  
106 sophisticated cognitive abilities, including tactical deception [38-40] and reconciliation [41],  
and it can also predict the actions of other individuals [41,42]; these are traits requiring  
108 mental abilities that may be correlated with the ability for self-recognition, as seen in other  
species [16,29,43-45].

110  
During the mirror test, animals must visually locate a mark in a mirror image. The  
112 interpretation of the test is that animals regard the mark on the body as unusual and thus  
examine it. It is reasonable to predict the wrasse will perceive the coloured marks as visually  
114 similar to ectoparasites, and may thus evoke an attentional response that may culminate in a  
removal attempt [46-47]. However, lacking hands and arms, any attempt to remove or  
116 interact with the mark would necessarily take a different form to that observed for primates or  
elephants. Fortunately for the question at hand, many fish taxa, including cleaner wrasse,  
118 display a characteristic behaviour that functions to remove irritants and/or ectoparasites from  
the skin surface [48,49], termed glancing or scraping. This behaviour may therefore be  
120 considered as self-directed, just as for some mammal species that also lack hands in which  
scraping is taken as an indicator of self-directed behaviour during the mirror test [29,50]. We  
122 therefore consider the cleaner wrasse to possess the necessary sensory biology and  
behavioural repertoire to adequately employ the mirror test, and here use a modified  
124 experimental paradigm established for studies of humans and apes to test for mirror self-

recognition in a fish. Importantly, this species allows us to ask whether the criteria that are  
126 accepted as evidence for mirror self-recognition in mammals and birds can be applied to  
other taxa, and if they fulfil these criteria, what it means for our interpretation of the test itself.

128

In applying the mirror test, transitions among three behavioural phases after initial exposure  
130 to a mirror are typically [1,4,5,6]; these transitions among behavioural phases are interpreted  
as additional evidence of self-recognition, although in themselves do not constitute passing  
132 the mirror test [1,4]. We first tested whether the cleaner wrasse passed through all three  
behavioural phases upon exposure to a mirror placed in an experimental tank (Fig. 1A), and  
134 if so, we describe the phases in cleaner fish. The first phase (*i*) is a social reaction towards  
the mirror, apparently as a consequence of the reflection being perceived as an unknown  
136 conspecific. In phase (*ii*), animals begin to repetitively perform idiosyncratic behaviours that  
are rarely observed in the absence of the mirror. These behaviours are interpreted as  
138 contingency testing between their own actions and the behaviour of the reflection [e.g. 1,4].

In phase (*iii*), the animal begins to gaze and examine their reflection as if it is a  
140 representation of the self, and uses the mirror to explore their own body in the absence of  
aggression and mirror-testing behaviour [1,4,5]. If they passed these phases, we applied the  
142 mark test.

## 144 **Results and discussion**

### 146 Progression of behaviours in response to the mirror

148 Prior to starting the experiments, the focal fish swam around the tank and showed no  
unusual reactions to the covered mirror. Immediately after initial exposure to the mirror, 7 of  
150 10 fish responded aggressively to their reflection, attacking it and exhibiting mouth-to-mouth  
fighting [45,46] (Fig. 1A,B, Supplementary Movie S1) suggesting that the focal fish viewed  
152 the reflection as a conspecific rival. The frequency of mouth fighting was highest on day 1,

and decreased rapidly thereafter, with zero occurrences by day 7 (Fig. 1Ca; cf. with the  
154 similar decrease in aggression seen in chimpanzees, and shown in Fig. 2 of [1]) and hardly  
any aggression over the following month.

156

As mouth fighting towards the mirror reflection decreased, the incidence of unusual and  
158 atypical behaviours (e.g. 'upside-down approach' and 'dashing along mirror'; Table 1, Movies  
S2, S3) significantly increased and was highest on days 3–5 (Fig. 1Ca). On days 3 and 4, the  
160 estimated average frequency of these atypical behaviours among the seven individuals was  
36 times per hour during the daytime. Each of these atypical behaviour types was of short  
162 duration ( $\leq 1$  s), often consisting of rapid actions that occurred suddenly within 5 cm of the  
mirror. At the end of each movement, the fish remained near the mirror, and appeared as if  
164 they were viewing their reflection (Movies S2, S3). These atypical behaviours could be  
loosely grouped into five types: not against the mirror reflection, dashing along the mirror  
166 without and with attaching the head on the surface (atypical behaviours, *a* and *b*,  
*respectively*); dashing towards the reflection but stopping before touching it (*c*); and  
168 idiosyncratic postures and actions of short duration performed in front of the mirror: upside-  
down approach (*d*), and quick dance (*e*) (Table 1). While it is possible to interpret these  
170 behaviours as a different form of aggression or social communication, they have not been  
recorded in previous studies of social behaviour in this species [46] and were not part of a  
172 courtship display, as all of the subject fish were females.

174 These atypical behaviours were highly repeatable within an individual, with each fish  
performing one or two types of behaviour more than 400 times a day on average during days  
176 3 and 4 (Table 2; Fisher's exact probability test for count data with simulated *P*-value based  
on 2,000 replicates of  $P = 0.0005$ ). Crucially, these behaviours occurred only upon exposure  
178 to the mirror, and were not observed in the absence of the mirror (i.e. before mirror  
presentation). Almost all of the behaviours ceased by day 10 (Fig. 1Ca), and thereafter were  
180 hardly observed at all over the following month.

182 These behaviours are different from the previously documented contingency-testing  
behaviours of great apes, elephants and magpies [1,4,7], but given the taxonomic distance  
184 between them, this could hardly be otherwise. While primates and elephants may perform  
more anthropomorphic behaviours such as changing facial expression, or moving the hands,  
186 legs or trunk in front of the mirror, wrasse and other fishes cannot perform behaviour that is  
so easily interpreted by a human observer. Nevertheless, behaviours such as rapid  
188 swimming and other spontaneous actions could represent alternative indices of contingency  
that are within the behavioural repertoire of the study species (Table 1).

190

In summary, the atypical movements observed in cleaner wrasse were characterised by  
192 almost every aspect of contingency-testing behaviour documented previously [1,4,5,7]: 1)  
atypical and idiosyncratic, 2) occurring repeatedly, 3) occurring in front of a mirror, 4) not  
194 occurring in the absence of a mirror, 5) occurring after a phase of initial social behaviour, 6)  
occurring over a short period of time and 7) distinct from aggressive behaviour. Fulfilment of  
196 these conditions supports the contingency-testing hypothesis. Although we reserve  
judgement as to whether these behaviours should be interpreted as evidence that the fish  
198 examine and perceive the reflection as a representation of self, we nevertheless conclude  
that these behaviours are consistent with phase (*ii*) of MSR as presented for other taxa.

200

In phase (*iii*), which is difficult to clearly distinguish from phase (*ii*), species that pass the  
202 mark test increase the amount of time spent in front of the mirror in non-aggressive postures  
while viewing the mirror image [1,4,5,7]. This interpretation is again rife with pitfalls, as it  
204 requires an assessment of the intentionality of unusual animal behaviours. An agnostic  
approach is to simply measure the amount of time animals spend in postures that reflect the  
206 body in the mirror [2]. This gives an upper measurement of the time in which animals could  
be observing their reflection while making no inferences about the intentionality of the act.  
208 We observed an increase in the amount of time spent in non-aggressive postures while close



to the mirror (distance of < 5 cm), peaking on day 5 after mirror presentation and remaining  
210 consistently elevated (Fig. 1Ca;  $107.0 \text{ sec} \pm 21.2 \text{ [SD]}/10 \text{ min}$ ) versus days 1–4 and the  
several days prior to mirror presentation ( $37.0 \text{ sec} \pm 11.5$ , Wilcoxon sign-ranked test,  $T = 36$ ,  
212  $P = 0.008$ ); this behaviour was consistent with phase (iii) of MSR. We did not observe  
specific viewing behaviour that is seen in chimpanzees and elephants, e.g. trying to look at  
214 body parts, such as inside the mouth or between the legs. It is inherently difficult to  
distinguish such looking behaviours from other behaviours primarily because gaze direction  
216 could not be determined in this species. Technological developments that allow eye tracking  
in free-swimming fish may alleviate this difficulty in future studies.

218

Similar to other studies, not all individuals we tested passed through each phase of the test.  
220 After the initial presentation of the mirror, three fish (#4, #5, #6) showed low levels of  
aggression and rarely performed atypical behaviours during period E1 (Fig. 1Cb). Instead,  
222 these three individuals spent relatively longer periods in front of the mirror, as is typically  
observed during phase (iii) in other focal fish (Fig. 1Cb). By applying the same criteria as  
224 applied for other instances of the test, we conclude these fish failed the test. However, an  
alternative explanation is that these fish had already passed through the initial phases; at the  
226 start of the experiment, the glass wall on the opposite side of the mirror in the tanks of these  
three fish was slightly reflective due to differences in lighting in the room, and the focal fish  
228 were observed to occasionally remain in front of the glass wall. These observations suggest  
that these three fish may have already passed through phases (i) and (ii) during the  
230 acclimation phase before the start of experiment. As discussed below, these three fish  
exhibited good responses to the mark test.

232

Species with MSR distinguish their own reflection from real animals viewed behind glass  
234 [e.g. 29]. When we exposed naïve cleaner wrasse to conspecifics behind glass, we observed  
fundamentally different responses towards their mirror image. Aggressive behaviour  
236 frequency towards real fish was generally low, yet did not diminish appreciably during the 2-

week testing period (Fig. 1D). Time spent within 5 cm of the glass in the presence of  
238 conspecifics was also higher than that in the presence of the mirror. Importantly, no atypical  
or idiosyncratic behaviour (i.e. contingency-testing) was exhibited towards conspecifics.  
240 These behaviours were only observed upon exposure to the mirror.

#### 242 Mark test

244 In the second part of the experiment, we used a modified standard mark test protocol to  
assess reactions to visible or sham (clear or un-pigmented) coloured marks. We used  
246 subcutaneously injected elastomer (see Material and methods; Northwest Marine  
Technology Inc. (NMTI), Anacortes, WA, USA). The coloured marks are applied with a small  
248 amount of coloured gel using a fine needle, a procedure, which has been repeatedly shown  
not to affect fish behaviour [51-54, NMTI], and is widely used in fish behavioural studies.  
250 Moreover, use of both visible coloured and invisible sham marks directly controlled for any  
effects of application, including irritation or tactile sensations around the marking site.  
252 Nevertheless, the procedure was necessarily modified from terrestrial tests due to the  
requirements of provisioning marks in the aquatic environment, and on animals covered in a  
254 protective mucus coating. Because of this, it involved potentially higher tactile stimulation  
than e.g. paint marks on elephant skin. We controlled for these direct tactile effects with a  
256 sham-marking experimental phase, observing no effect (see below). Nevertheless, we must  
consider a recent study that showed visual-somatosensory training induced self-directed  
258 behaviour in rhesus monkeys [10,11], which could not be achieved through visual stimuli  
alone. Our study differs in that we do not provide direct somatic stimulation during the mirror  
260 test, and much evidence suggests that no further tactile stimulation is maintained by  
elastomer injections after the procedure. However, given the nature of the mark application,  
262 we cannot rule out that a combination of visual and tactile cues produces the behavioural  
responses we describe.

264

Fish were marked at night while under anaesthesia, and they swam normally early the next  
266 morning under a no-mirror condition (Kohda, pers. obs.). After the initial settlement period  
“E1” (i.e. the initial 2 weeks of phases *i–iii*), we evaluated behaviour during periods “E2” (no  
268 mark), “E3” (injection with invisible sham mark), “E4” (injection with coloured mark with no  
mirror present) and “E5” (coloured mark with mirror present) during a further 2-week period.  
270 The sham and coloured marks were applied on the right side of the head of two fish, on the  
left side of the head of two other fish and under the throat in a further four fish (Fig. 2A);  
272 these areas were only visible in the mirror. Each mark was in the form of a small brown dot  
resembling an ectoparasite.

274

1) Viewing coloured marks in the mirror

276

We first examined whether fish were assuming postures in front of the mirror that would  
278 reflect the marked site by categorising all body postures performed within 5 cm of the mirror  
into three types: postures exposing the right side of the head to the mirror, postures exposing  
280 the left-side of the head, and frontal-vertical postures exposing the head, throat, and  
underside to the mirror. These postures would respectively reflect the right face mark, the left  
282 face mark, and the throat mark (Fig. 2B). We predicted that if fish were attempting to observe  
the coloured marks on body parts reflected in the mirror, they would assume postures that  
284 facilitated this observation of the mark significantly more frequently during E5 (mirror, colour  
mark), than E2 (mirror, no mark), or E3 (mirror, transparent sham mark). Two independent  
286 and comprehensive analyses of the videos were conducted (by MK, JA), as well as two  
further blind analyses by unrelated researchers of a subset (15%) of the videos; the  
288 frequencies of the postures were highly correlated between the analyses ( $r = 0.988$ ).

290 Posturing behaviours against the marked sites during periods E2 and E3 were infrequent and  
were not different between the two periods (Fig. 2Ca), a pattern driven by all fish except fish  
292 #7, which showed equal distributions of viewing angles (Table 3). This shows that the

marking procedure itself had minimal effect on fish behaviour. In contrast, time spent  
294 posturing while viewing the marked sites was significantly higher in the coloured- (E5) versus  
no- (E2) and sham-marked (E3) periods (Fig. 2Ca), as predicted. This pattern held for all  
296 individuals except fish #2, regardless of the sites marked (Table 3). Note that no  
comparisons to E4 can be made with respect to observations of reflections, as no mirror was  
298 present during that period. Moreover, the time spent in postures reflecting the two remaining  
unmarked sites (e.g. right side of head and throat, for a fish marked on the left side of head)  
300 for each fish were not different among periods (Fig. 2Cb). Taken together, these findings  
demonstrate that cleaner wrasse spend significantly longer in postures that would allow them  
302 to observe colour-marked sites in the mirror reflection. These reactions also demonstrate that  
tactile stimuli alone are insufficient to elicit these behaviours, as they were only observed in  
304 the colour mark/mirror condition. Rather, direct visual cues, or a combination of visual and  
tactile stimuli, are essential for posturing responses in the mirror test. In previous studies on  
306 dolphins, similar patterns of activity were considered to constitute self-directed behaviour [5].

308 2) Scraping of the colour-marked throat after viewing it in the mirror

310 Although they cannot touch their own bodies directly, many species of fish scrape their  
bodies on a substrate to remove irritants and/or ectoparasites from the skin surface [48,49].  
312 When we marked fish with brown-pigmented elastomer on the lateral body surfaces in  
locations that could be viewed directly, the fish increased scraping behaviour of the mark  
314 sites, indicating they regard the colour dots as ectoparasites to be removed (Supplementary  
Figure S1). Similar scraping of colour-marked areas during the mark test is interpreted as an  
316 indicator of self-directed behaviour for some mammal species that do not have hands  
[29,50]. Accordingly, we hypothesised that the cleaner wrasse would scrape their bodies in  
318 an attempt to remove coloured marks from body parts not directly visible after observing  
them in the mirror (and crucially, that they did not scrape invisible sham marks, nor coloured  
320 marks in the absence of a mirror). As discussed earlier, if we observe a behaviour in a fish

that is accepted to be functionally equivalent to a similar behaviour in mammals (in this case  
322 scraping), and that behaviour is accepted as being self-directed in those mammals [29, 50],  
then it raises the question whether this behaviour may be similarly considered self-directed in  
324 the fish. If this position is accepted, then any scraping behaviour of coloured marks in the  
mirror condition would constitute compelling evidence that fish use mark-directed behaviour  
326 to remove visually perceived coloured marks from their bodies. By extension and comparison  
to similar mirror test studies, this would raise the question of whether fish are therefore aware  
328 that the mirror reflection is a representation of their own body.

330 Like many natural behaviours, some scraping of the body flanks was observed outside the  
mirror condition in our studies. This body scraping behaviour was also difficult to distinguish  
332 from head scraping. Because of these factors we took throat scraping, and not face scraping,  
as the only evidence of a putative self-directed behaviour because it was never observed  
334 outside the period E5 in any of the subject fish. It is also important to note that fish marked  
on the head laterally scraped the body flank/facial region, but never the throat region, during  
336 period E5, providing further evidence that marking itself does not induce throat scraping.  
Three of the four throat-marked fish frequently scraped their throats against the substrate  
338 after being exposed to the mirror during period E5 (Fig. 3A, B, Movies S4–S6), but none of  
the four fish exhibited this behaviour during E2–E4. We observed 37 separate instances of  
340 throat scraping during E5 (15 for fish #1, 16 for fish #4, 6 for fish #21; Friedman test,  $\chi^2 = 9.0$ ,  
 $df = 3$ ,  $P = 0.029$ ; binomial test within individuals, E2, E3 and E4 vs. E5: 0 vs. 15 scrapings,  
342  $P < 0.0001$  in fish #1, 0 vs. 16 scrapings,  $P < 0.0001$  in fish #4, 0 vs. 6 scrapings,  $P = 0.031$   
in fish #21). These three fish attempted to scrape their throats but this was occasionally  
344 executed awkwardly, probably because they were not accustomed to performing this  
behaviour. As the marks were identical in periods E4 and E5, with the only change being the  
346 visibility of the mirror, the difference in throat scraping provides further strong evidence that  
the colour injection itself did not cause direct physical stimulation that would lead to the  
348 observed behaviours (e.g. itching or pain).

350 These results accord with the increased amount of time spent in postures indicating  
observation of the coloured marks in the reflection only during period E5 (Fig. 2Ca). The  
352 motivation for scraping the mark is potentially to remove a perceived ectoparasite, which  
these wild-caught fish would have experienced previously. In all cases ( $n = 37$ ), the scraping  
354 behaviours followed soon after the fish had assumed a posture that reflected the throat mark,  
with an average latency between observation in the mirror and scraping of the substrate of  
356  $1.93 \text{ sec} \pm 1.16$  ( $n = 37$ ; see Fig. 3C, Movies S4–S6). However, posturing was not always  
followed by scraping. The physical substrate on which fish scraped varied among individuals:  
358 all scraping was done in a narrow area of the sandy bottom by fish #1, and all and the  
majority (14/16) of the scraping of fishes #21 and #4 was done on a rock in the corner of the  
360 tank despite the same arrangement in all tanks. This may be because fish learn successful  
scraping techniques associated with specific substrates and continue to use them.

362

The majority of the throat scraping behaviour was immediately followed by another frontal-  
364 vertical posture performed in front of the mirror (after  $1.82 \text{ sec} \pm 1.46$ ;  $n = 31$ ; Movie S6).  
Assuming frontal-vertical postures during swimming is atypical, and in these postures  
366 observation of the marked site via the mirror-reflection is possible. As such, this pattern of  
behaviour may constitute contingency testing, in this case to check if the perceived parasite  
368 had been removed by the scraping attempt. While this interpretation does imply intentionality  
on the part of the animal, the general rarity of this behavioural sequence, and frequency with  
370 which it was displayed during the mark test, provide compelling evidence for this  
interpretation. Indeed, this type of behaviour is similar to that of chimpanzees, which examine  
372 and smell their fingers after touching a paint mark [1,8], and which is considered intentional  
self-directed behaviour in that species.

374

Three of the four throat-marked individuals in this study passed the mark test, a success ratio  
376 comparable to other species tested previously; one of three Asian elephants passed the test

[4], as did two of five magpies [6]. Fish #20 in our study was throat-marked but did not  
378 perform throat scraping (Fig. 3B). However, this fish exhibited intensive contingency-testing  
behaviours (a) and (b) during period E1, prior to colour-marking, similar to the other fish  
380 (Table 2), and assumed postures (self-directed behaviour) that reflected the throat more  
frequently during E5 after colour marking (Table 3). According to the mark test criteria used  
382 for dolphins [5], these results suggest that this wrasse recognised the reflection as self, but  
“fell at the last hurdle”. Nevertheless, given the controversial nature of the mark test in non-  
384 primates, and questions over the interpretation of these behaviours [8], we do not take this  
result as conclusive evidence for MSR in this individual. We do point out, however, that by  
386 the same criteria used for e.g. dolphins, we would conclude that all four throat-marked fish  
recognised themselves in the mirror.

388

In this study we applied the mark test, a controversial assessment of animal cognition [8], to  
390 a fish, a taxonomic group often considered to have lower cognitive abilities than other  
vertebrate taxa. We find compelling evidence that cleaner wrasse pass through all stages of  
392 the mark test, ultimately attempting to remove the mark when it is able to be viewed in the  
mirror (Figure 3). We further find the parsimonious conclusion to be that the behaviours  
394 displayed by this fish are equivalent to behaviours taken as evidence for self-recognition in  
other taxa (contingency testing, self-directed behaviour, observation and exploration of the  
396 body in a reflected image, and removal attempts; Figures 1,2,3). We consider these  
behavioural responses to be a consequence of the particular feeding ecology, generally high  
398 cognitive capacity, and problem-solving skills of the cleaner wrasse [14-16,37,38]. This is the  
first report of successful passing of the mark test in vertebrates outside of mammals and  
400 birds, suggesting that if mirror tests are applied considering the cognitive capacities and  
ecology of focal species outside of primates, they too may pass the test. Our study further  
402 supports previous theories postulating that recognition and cognitive capacities are more  
closely related to social and behavioural ecology than relative brain size or phylogenetic  
404 proximity to humans [14,16,32].

406 The results we present here will by their nature lead to controversy and dispute, and we  
welcome this discussion. We consider three possible interpretations of our results and their  
408 significance for understanding the mark test: i) the behaviours we document are not self-  
directed and so the cleaner wrasse does not pass the mark test, ii) cleaner wrasse pass the  
410 mark test and are therefore self-aware, or iii) cleaner wrasse do pass the mark test but this  
does not mean they are self-aware. If one takes position i), rejecting the interpretation that  
412 these behaviours are self-directed, it is necessary to demonstrate grounds for this rejection.  
As noted above, touching or scraping behaviour is taken as evidence of a self-directed  
414 behaviour in mammals, and so if these behaviours are not similarly considered self-directed  
in fish, the question must be asked why. For a test to be applicable across species, an  
416 objective standard is required. Without such a standard, behaviours assessed in the mark  
test can be differently assessed depending on the taxon being investigated. This introduces  
418 an impossible, and unscientific, standard for comparison and we therefore reject this  
conclusion or must reject the validity of the mark-test entirely.

420

We therefore consider the most parsimonious conclusion to be that the behaviours we  
422 observe here in cleaner wrasse are equivalent to those in other taxa during the mirror test.  
Based on this, and on the original interpretation of the mark test by its inventor Gallup, who  
424 suggested species that pass the mark test are self-conscious and have a true theory of mind  
[1,57], would therefore lead us to take position (ii), that cleaner wrasse are self-aware.  
426 However, we are more reserved about the interpretation of these behaviours during the mark  
test with respect to self-awareness in animals. We do not consider that the successful  
428 behavioural responses to all phases of the mark test should be taken as evidence of self-  
awareness in the cleaner wrasse, but rather that these fish come to understand that the  
430 mirror reflection represents their own body. From the behaviour we observe, we consider the  
interpretation that makes fewest assumptions to be that these fish undergo a process of self-  
432 referencing, whereby the fish use the mirror to see their own body, but without this involving



theory of mind or self-awareness [32]. This interpretation is supported by a supplementary  
434 experiment (Supplementary Figure S1) that showed fish marked on the body in places they  
could directly see also performed scraping on those regions.

436

If we therefore accept position (iii), that cleaner wrasse show behavioural responses that fulfil  
438 the criteria of the mark test, but that this result does not mean they are self-aware, a question  
naturally arises. Can passing the mark-test be taken as evidence of self-awareness in one  
440 taxon but not another? A position that holds the same results can be interpreted different  
ways depending on where they are gathered is logically untenable, and so must be rejected.  
442 This leaves us with the only option to re-evaluate our interpretation of what the mark-test  
means, in particular to reject the position that successfully passing the mark test means  
444 animals are self-aware and accept that successful performance in the mark test may be  
driven by numerous processes. To hold any other dualistic interpretation of the test would be  
446 taxonomically chauvinistic and would undermine the standing of the mark test as a valid  
metric of self-cognizance in animals (34). Based on our findings, we therefore advocate for a  
448 reappraisal of the interpretation of the mark test, and conclude that many more species may  
be able to pass the test when it is applied in a manner that is sympathetic to their natural  
450 biology.

## 452 MATERIAL AND METHODS

454 **Animals and housing.** The cleaner wrasse, *Labroides dimidiatus*, is a protogynous  
hermaphrodite that lives in coral reef habitats [46,58]. We used 10 wild fish obtained from  
456 commercial collectors in this study. Prior to our experiments, the fish were housed in  
separate tanks (45 × 30 × 28 cm<sup>3</sup>, Fig. 1A) and each fish was kept for at least 1 month prior  
458 to beginning the experiments to ensure acclimation to captivity and the testing conditions,  
and that they were eating and behaving normally. Fish were between 51–68 mm in length;  
460 this is smaller than the minimum male size, thus strongly suggesting that these individuals

were functionally female. Individual fish sizes were as follows: 68 mm for fish #1, 62 mm for  
462 fishes #13 and #20, 61 mm for fish #21, 58 mm for fish #4, 55 mm for fish #5, 53 mm for fish  
#6, 52 mm for fish #2, and #7 and 51 mm for fish #3). Each tank contained a  $5 \times 5 \times 10 \text{ cm}^3$   
464 rock in the corner, and a PVC pipe that provided shelter on a coral-sand substrate 3–4 cm  
deep. The water was maintained at 24–26°C and was aerated and filtered. The fish were  
466 maintained on a 12 h: 12 h light: dark cycle. Artificial flake food (Tetramin; Tetra, Blacksburg,  
VA, USA) and small pieces of diced fresh shrimp were given twice daily.

468

**Mirror presentation to fish.** The mirror presentation method (e.g. duration, timing, position  
470 and mirror size and shape) has important consequences for successful implementation of  
MSR studies [1,4,5]. We presented a  $45 \times 30 \text{ cm}^2$  high-quality mirror on a glass wall of the  
472 same size inside the experimental tank (Fig. 1A). The mirror was positioned at night, while  
the fish were sheltered within the PVC pipe, 1 week before beginning the experiments; it was  
474 then completely covered with a white plastic sheet ( $45 \times 30 \text{ cm}^2$ ). At the start of the  
experiments, the white cover on the mirror was removed, and the subject fish were exposed  
476 to the mirror until the end of the series of experiments, with the exception of a half-day  
experiment during which the mirror was completely covered with the white sheet (see below).

478

**Order of presentation of the five experiments, E1–E5.** We studied fish behavioural  
480 responses during five experimental periods, from Experiment 1 (E1) to Experiment 5 (E5) (in  
chronological order). All behaviours were recorded by video camera (HDR-CX370; Sony,  
482 Tokyo, Japan), and the field of view encompassed the entire experimental tank (Fig. 1A).  
After the start of the experiment (i.e. uncovering of the mirror), the behavioural responses of  
484 fish were video-recorded eight times over a 2-week period: every day for the first 5 days, and  
then again on days 7, 10 and 15 (period E1: initial responses to mirror). Three or four days  
486 after the end of period E1, fish behaviours were recorded for 2 consecutive days as a control  
for the mark test (E2: no mark). Two or three days after E2, a non-visible sham-mark (white  
488 or non-pigmented elastomer) was made on all 10 fish, and behavioural responses were

recorded over the next 2 days (period E3: sham-marking). Two days after period E3, the fish  
490 were marked with a coloured (brown) elastomer mark at night, and their behaviours were  
recorded in the morning of the following day while the mirror was covered with the 45 × 30  
492 cm<sup>2</sup> white plastic sheet (period E4: colour mark with no mirror present). After this observation  
phase, the mirror was uncovered and behaviours were recorded on the afternoon of the  
494 same day, and also on the morning of the following day (period E5; colour-mark with mirror  
present). All experiments were necessarily run in this order because coloured tags could not  
496 be removed from fish once applied; hence, transparent (sham) marks always preceded  
coloured marks. The four fish that were marked on the head showed an increase in scraping  
498 of the marked area during period E5. However, three of these fish were also observed  
scraping facial areas prior to colour marking, indicating that face-scraping cannot be taken as  
500 unequivocal evidence of mirror-induced self-directed behaviour.

502 **Provisioning mark procedure.** Elastomer tags and visible implant elastomer (VIE) marking  
(Northwest Marine Technology Inc., Shaw Island, USA) via subcutaneous injection are  
504 widely used in studies of individually marked live fish and do not affect fish behaviour [51-54,  
NMTI]. Our fish were taken from their tanks at night together with their PVC pipe, and placed  
506 in eugenol solution to achieve mild anaesthesia (using FA100; Tanabe Pharmacy Inc.,  
Japan). An un-pigmented gel mark was injected subcutaneously in an area of 1 × 2 mm<sup>2</sup> at  
508 one of three sites during the sham mark period: on the right side of the head (two fish), on  
the left side of the head (two fish) or under the throat (four fish; Fig. 2A). The entire injection  
510 process took no longer than 5 minutes, and the fish were returned to their original tank  
together with the pipe after the mirror was covered with the white plastic sheet. We ensured  
512 that the fish were swimming normally the next early morning, and showed no behavioural  
changes as a consequence of the tagging procedure. We initially used white pigment on the  
514 pale-coloured body areas, but found that the skin in these areas had a slight blue tint, and  
that the white tag was visible in two fish; these fish were not used in further experiments. A  
516 brown-pigmented elastomer colour mark was applied as colour-mark at night before the day

of E4. After confirming that all marks were of the same size ( $1 \times 2 \text{ mm}^2$ ), the fish were  
518 returned to the tank. Given the location of the tags relative to the field of view of cleaner  
wrasse, direct observation of the marks on the head was unlikely, and was definitely  
520 impossible for throat marks. To standardise the testing procedure, the brown-coloured mark  
was injected at the throat near the transparent marked site. Even with both marks applied,  
522 the total volume of the tag was lower than the minimum recommended amount, even for  
small fish, and  $< 13\%$  of the size of tags used in studies with other fish: biologists who  
524 applied VIE to small fish in previous studies, i.e. 26-mm brown trout [51] and 8-mm  
damsel fish [54] stated that the amounts used were minute, but for the former species 2–3  
526 mm tags were made with 29 G needles [51]. Willis and Babcock used large tags ( $10 \times 1 \times 1$   
mm (127/ml) in *Pagrus auratus* (from NMTI) [53]. Our own tagging method was therefore  
528 very unlikely to have caused irritation. Moreover, we saw no evidence during period E4  
(colour tag, no mirror present) of any removal attempts or scratching behaviour, further  
530 confirming that the tags did not stimulate the fish.

532 **Behavioural analyses.** Videos of the fish behaviours were used for all behavioural analyses.  
Fish performed mouth-to-mouth fighting frequently during period E1, and the duration of this  
534 behaviour was recorded (Fig. 1B, Movie S1). Unusual behaviours performed in front of the  
mirror, which have never been observed before in a mirror presentation task, nor in the  
536 presence of a conspecific, were often observed during the first week of E1, and the type and  
frequency of these behaviours was recorded.

538

**Description of postural behaviours performed in front of the mirror and behavioural**  
540 **observations.** In the latter half of E1, fish occasionally swam slowly or remained stationary  
in front of the mirror, and the duration (in seconds) of these behaviours, when performed  
542 within 5 cm of the mirror, was recorded. The duration of postures in which the marked area  
was reflected in the mirror (i.e. viewing behaviours) was recorded during E2 (no mark), E3  
544 (sham mark) and E5 (coloured mark with mirror present). Posturing within 5 cm of the mirror

was categorised into three types: right sided posture (i.e. reflecting the right side of the  
546 head), left-sided posture (reflecting the left side of the head) and frontal-vertical posture  
(reflecting the throat). The duration (in seconds) of each of the three types of posture was  
548 recorded during six separate 5-min observation periods, for a total of 30 min per fish for each  
of the periods when a mirror was present (E2, E3 and E5). A subset of 15% of the videos  
550 was blindly analysed by two researchers outside our team; their analysis was highly  
correlated with the main analysis ( $r = 0.887$ ,  $P < 0.0001$ ), and statistical tests showed no  
552 significant differences between the two datasets (two-way repeated-measures analysis of  
variance [ANOVA], blind effect:  $F = 0.06$ ,  $P = 0.80$ , blind effect  $\times$  observation site:  $F = 0.77$ ,  $P$   
554  $= 0.45$ ).

Scraping behaviour, including the location on the body that was scraped, was observed  
556 during periods E2–E5 in the eight subject fish. During period E5, when the fish were colour-  
marked and exposed to the mirror, individuals often displayed the marked site to the mirror  
558 immediately prior to and following a scraping behaviour. Therefore, we also recorded the  
time interval between displaying and scraping during E5.

560

**Responses towards real fish.** A potential alternative explanation of behaviour in mark tests  
562 (and one that is rarely tested for in other vertebrates) is that the focal individual perceives  
their reflection not as the self, but rather as another individual behind a glass divide. Although  
564 many behaviours seen in the mark test suggest that this is not the case (e.g. contingency-  
testing, body exploration), and a growing body of evidence shows that fish perceive mirror  
566 reflections in a fundamentally different way to conspecifics behind glass [59,60], we directly  
controlled for this possibility by comparing the behaviour of fish confronted with a reflection to  
568 that when another individual was across a glass divide.

570 We tested the responses of eight fish (55–59 mm in size) in size-matched pairs. Two fish  
were introduced into a tank ( $45 \times 30 \times 26$  cm<sup>3</sup>). After the fish became acclimated, the cover  
572 was removed from the divider to allow them to see one another. We then recorded

behavioural responses in the same manner as described for period E1 in the mirror test, for 2  
574 weeks. The results of these observation are presented in Fig. 1D. After 3 weeks, we marked  
these fish on the throat and recorded whether they scraped their throat regions; however, we  
576 did not observe any throat-scraping behaviour, although they must have observed the  
'parasite' on the throat of the conspecifics. This indirectly supports the view that the fish were  
578 attempting to remove the mark from their own bodies when presented with the mirror during  
period E5 of the actual mark test.

580

582 **Statistical analyses.** Statistical analyses were performed using SPSS (ver. 12.0; SPSS Inc.,  
Chicago, IL, USA) and R software (ver. 2.13.2; R Development Core Team 2011). During  
584 period E1, the responses of the subject fish to the exposed mirror changed significantly over  
time. Changes in the duration of mouth fighting and time spent within 5 cm of the mirror over  
586 time were analysed with linear mixed models (LMMs). Similarly, changes over time in the  
duration of mouth fighting and time spent within 5 cm of the mirror were analysed with LMMs  
588 for the experiments using real fish across glass dividers. The frequency of unusual mirror-  
testing behaviours was analysed using a generalised linear mixed model (GLMM) with a log-  
590 link function and assuming a Poisson distribution. Time spent in postures reflecting the right  
side of the head, left side of the head and the throat were compared between mark types  
592 during the mark tests (E2: no mark, E3: sham mark and E5: coloured mark with mirror  
present) using repeated-measures ANOVA. Note that the marked and unmarked positions  
594 were analysed separately (Fig. 2Ca, b). Individual-level statistics on postures that reflected  
the marked sites are shown in Table 3 (Mann–Whitney  $U$  test with duration in seconds of the  
596 six different behaviours per 5-min observation in periods E2, E3 and E5). To detect the effect  
of throat marking on the frequency of scraping behaviour, a Friedman test was used on the  
598 entire data set (E5 vs. E2, E3 and E4) and a binomial test was used for comparison between  
periods (E5 vs. E2, E3 and E4). No throat scraping or unusual behaviours were observed

600 when individuals interacted with conspecifics across a glass divider, so no statistical tests  
601 were performed for that condition.

602

**Ethics statements.** Our experiments were conducted in compliance with the animal welfare  
604 guidelines of the Japan Ethological Society, and were specifically approved by the Animal  
Care and Use Committee of Osaka City University.

606

## SUPPORTING INFORMATION

608

**Responses to color dot on flank directly visible and color dot on the mirror.** If cleaner  
610 fish pass the mark-test, they will also scrape the mark when they detect directly it on its flank  
without the aid of mirror. We examined whether cleaner wrasse respond to the mark dot on  
612 the flank without mirror. Five other fish of the same size range were kept in experiment tanks  
without mirror, and their behaviours were video-recorded for 3 hours in each three conditions  
614 in the chronological order of, i) no marking as control, ii) transparent sham marking on the  
center of left body side, directly visible for the fish, and iii) colored marking on the left area of  
616 the same side of flank, using the same procedure of the mark test. The results are shown in  
Supplementary Figure S1. Both sides of the body were scraped on substrate infrequently in  
618 the control i) and sham mark ii). In contrast, in the marked phase iii), the marked site in left  
flank were frequently rubbed more than right side in the same phase, and than left side of  
620 control and sham marking phases (Interaction:  $\chi^2 = 12.35$ ,  $df = 2$ ,  $n = 5$ ,  $P < 0.002$ ), strongly  
indicating that cleaner fish regard the directly visible color dot on body surface as  
622 ectoparasite.

624 Cleaner wrasse will regard the color dots on body skin as ectoparasite, but do they also  
regard the same dots on elsewhere, e.g. on mirror as the ectoparasite? We video-recorded  
626 and examined their responses of the other 4 fish to the color dot on mirror on the first day  
and 10 days after mirror presentation. On 10 days fish will do MSR. The video-record of 30

628 min showed all fish ignored, hardly watched and approached the color dots on the mirror,  
and never stayed in front of it in both days, indicating fish did not pay attention to the dot.

630 Cleaner fish show directed removal attempts toward the mark (Supplementary Figure S1),  
indicating that marks on the body are perceived differently to those elsewhere in the

632 environment, whether these bodily marks are observed directly or with a mirror.

634 **Visual and tactile stimuli by the colour mark.** We further considered whether the  
elastomer tag could provide a tactile stimulus that, when paired with visual information, may  
636 lead to individuals passing the mark test [8,55]. We can effectively rule out that tactile  
stimulation alone was sufficient to induce a self-directed behaviour [55] because we  
638 observed no throat scraping in any fish during periods E3 (sham mark) and E4 (coloured  
mark with no mirror present). This is in contrast to previous studies on rhesus monkeys using  
640 a somatosensory training stimulation in which the stimulus immediately elicited a response  
due to irritation [10,11] – we observed no such spontaneous response to the tactile stimulus.  
642 Moreover, and likely due to the inherent tendency of the species to search for ectoparasites  
on the body surface of clients and attempt to remove them [37,45], we did not observe a  
644 temporal progression in behaviour that may suggest direct or indirect association learning  
[8,10,56], rather a rapid onset of removal attempts in period E5. We therefore conclude that  
646 the behaviours we observe were primarily driven by visual stimulation, and required no  
association learning, but acknowledge the provision of elastomer tags may provide more  
648 tactile stimulation than paint marks [e.g. 1,4]. Future studies should attempt to experimentally  
disentangle these two stimuli to assess the roles of visual and tactile stimulation in mirror test  
650 with the cleaner wrasse.

652

## **Acknowledgements**

654



We are grateful to numerous conference attendees and anonymous reviewers for their  
656 constructive and vigorous advice on the experiments and the manuscript, and to members of  
the Laboratory of Animal Sociology, Osaka City University for their support and fruitful  
658 discussions. Financial support by a Grant-in-Aid for Scientific Research from the Ministry of  
Education, Culture, Sports, Science and Technology (MEXT), Japan (to MK), and by Japan  
660 Society for the Promotion of Science (to LAJ) is gratefully acknowledged.

662 **Author contributions.** MK, TT and LAJ conceived and designed the experiments. MK, TT,  
TH, HT and JA performed the experiments. SA and HT analysed the data, MK and LAJ wrote  
664 the manuscript.

**Competing interests.** The authors declare no competing interests.

666

## 668 **SUPPLEMENTARY MATERIALS**

One figure and six movies of captured cleaner wrasse behaviours during the mirror tests, i.e.  
670 aggressive fighting, idiosyncratic mirror-testing behaviour, and scraping of coloured marks on  
the throat.

672

### **Supplementary Figure**

674

**Supplementary Figure S1.** The frequencies of rubbing body sides by cleaner wrasse before  
676 marking (Control), after transparent marking (Sham) and colour marking (Mark) during 3  
hours without mirror. Sham and colour marking were on left flank, the area directly visible for  
678 fish ( $\chi^2 = 12.35$ ,  $df = 2$ ,  $n = 5$ ,  $P < 0.002$ )

### 680 **Supplementary Movies**

682 **Movie S1.** Mouth-to-mouth fighting against the mirror reflection on the second day after the  
initial mirror presentation in phase (*i*) (fish #1). The fish attack the reflection with open  
684 mouths during fighting in a common display of fish aggression.

686 **Movie S2.** An example of idiosyncratic behaviour. Mirror-testing behaviour (upside-down  
approach) performed by fish #1 on day 4. The fish approached the reflection in an upside-  
688 down position, but returned in front of the mirror and viewed the mirror following the  
behaviour.

690

**Movie S3.** An example of idiosyncratic behaviour. Mirror-testing behaviour (dashing along  
692 mirror; 'rapid dash') performed by fish #21 on day 4. The fish did not attack the mirror  
reflection, but looked at the mirror following the behaviour.

694

**Movie S4.** Scraping of the throat mark on the sandy bottom by fish #1 immediately after  
696 viewing the mark in the mirror. The fish assumed a position that reflects the throat in the  
mirror soon after scraping.

698

**Movie S5.** Fish #1 tried to scrape a throat mark on the sandy bottom immediately after  
700 viewing the mark in the mirror, but did not look at its throat in the mirror after scraping.  
However, the fish failed to scrape its throat on the sandy bottom, although the sand moved  
702 as the fish shook its head. The fish may not have checked its throat in the mirror, possibly  
because it had not been scraped.

704

**Movie S6.** The fish rapidly approached the mirror after scraping its throat on the sandy  
706 substrate, stopped at a distance of about 1 cm from the mirror, and remained stationary for 1  
s; during this time the fish assumed a position that reflected the scraped throat in the mirror.

## References

710

1. Gallup GG Jr (1970) Chimpanzees: self-recognition. *Science* 167: 86-87.

712

2. Keenan JP, Gallup GG Jr, Falk D (2003) *The head in the mirror: The search for the origin of consciousness*. Harper Collins New York.

714

3. Archer J (1992) *Ethology and human development*. Rowman & Littlefield.

4. Plotnik JM, de Wall FBM, Reiss D (2006) Self-recognition in an Asian elephant. *Proc*

716

*Natul Acad Sci USA* 103: 17053-17057.

5. Reiss D, Marino L (2001) Mirror self-recognition in the bottlenose dolphin: a case of cognitive convergence. *Proc Natul Acad Sci USA* 98: 5937-5942.

718

6. Morrison R, Reiss D (2018) Precocious development of self-awareness in dolphins.

720

*PLoS ONE* 13: e0189813.

7. Prior H, Schwarz A, Gunturkun O (2008) Mirror induced behaviour in the magpie (*Pica*

722

*pica*): Evidence of self-recognition. *PLoS Biol* 6: 1642-1650.

8. Anderson JR, Gallup GG (2015). Mirror self-recognition: A review and critique of attempts to promote and engineer self-recognition in primates. *Primates* 56: 317-326.

724

9. Itakura S (1987) Mirror guided behavior in Japanese monkeys (*Macaca fuscata*).

726

*Primates* 28: 343-352.

10. Chang L, Fang Q, Zhang S, Poo M, Gong N (2015) Mirror-induced self-

728

directed behaviors in rhesus monkeys after visual-somatosensory training. *Curr Biol* 25:212-217 .

730

11. Chang L, Zhang S, Poo M, Gong N (2017) Spontaneous expression of mirror-recognition in monkeys after learning precise visual-proprioceptive association for mirror images.

732

*Proc Natul Acad Sci USA* 114: 3258-3263.

12. Heyes CM (1994) Reflections on self-recognition in primates. *Anim Behav* 47: 909-919.

734

13. Heyes CM (1995) Self-recognition in primates: further reflections create a hall of mirrors. *Anim Behav* 50: 1533-1542.

736

14. Bshary R, Wickler W, Fricke H (2002) Fish cognition: a primate's eye view. *Anim Cog*  
738 5: 1-13.
15. Bshary R, Gingins S, Vail AL (2014) Social cognition in fishes. *Trend Cog Sci* 18: 465-  
740 471.
16. Bshary R (2011) Machiavellian Intelligence in Fishes. In: Brown C, Laland K, Krause J,  
742 editors. *Fish cognition and behaviour*. Wiley-Blackwell. pp. 277-297.
17. Brown C (2015) Fish intelligence, sentience and ethics. *Anim Cog* 18: 1-17.
- 744 18. Grosenick L, Clement TS, Fernald RD (2007) Fish can infer social rank  
by observation alone. *Nature* 445: 429-432.
- 746 19. Hotta T, Takeyama T, Heg D, Awata S, Jordan LA, Kohda M (2015) The use of multiple  
sources of social information in contest behavior: testing the social cognitive abilities of a  
748 cichlid fish. *Front Ecol Evol* <https://doi.org/10.3389/fevo.2015.00085>
20. Hamilton TJ, Myggland A, Duperreault E, May Z, Gallup J, Powell RA, Schalomon M,  
750 Digweed SM. (2016) Episodic-like memory in zebrafish. *Anim Cogn* 19: 1071-1079.
21. Burghardt GM, Dinets, Murphy JB (2014) Highly repetitive object play in a cichlid fish  
752 (*Tropheus duboisi*). *Ethology* 120: 1-7.
22. Jones AM, Brown C, Gardner S (2011) Tool use in the tuskfish *Choerodon schoenleinii*?  
754 *Coral Reefs* 30: 865.
23. Brown C (2012) Tool use in fishes. *Fish and Fish* 13:105–115.
- 756 24. Bshary R, Hohner A, Ait-el-Djoudi K, Fricke H (2006) Interspecific communicative and  
coordinated hunting between groupers and giant moray eels in the Red Sea. *PLoS Biol*  
758 4:e431
25. Vail A, Manica A, Bshary R (2014) Fish choose appropriately when and with whom to  
760 collaborate. *Cur Biol* 24: R791-R792.
26. Milinski M (1987) TIT FOR TAT in sticklebacks and the evolution of cooperation. *Nature*  
762 325: 433-435.
27. Milinski M (1990) On cooperation in sticklebacks. *Anim Behav* 40:1190–1191.
- 764 28. Salwiczek LH , Prétôt L, Demarta L , Proctor D, Essler J, Pinto AI, Wismer S, Stoinski T,

- Brosnan SF, Bshary R (2012) Adult cleaner wrasse outperform capuchin monkeys,  
766 chimpanzees and orang-utans in a complex foraging task derived from cleaner – client  
reef fish cooperation. PLoS ONE 7: e49068.
- 768 29. Delfour F, Marten K (2001) Mirror image processing in three marine mammal species:  
whales (*Orcinus orca*), false killer whales (*Pseudorca crassidens*) and California sea lions  
770 (*Zalophus californianus*). Behav Proc 53:181–190
30. Jordan LA, Ryan MJ (2015) The sensory ecology of adaptive landscapes. Biol Lett 11:  
772 20141054.
31. Thomas RK (1986) Animal intelligence. In: Insights into the animal mind. Washington:  
774 Smithsonian Institution Press, pp. 37-56.
32. Dunbar RIM (1998) Social brain hypothesis. Evol Anthropol 6: 178–190.
- 776 33. Bekoff M, Sherman PWS (2004) Reflection on animal selves. TREE 19: 176-180.
34. Ari C, D’Agostino DP (2016) Contingency checking and self-directed behaviours in giant  
778 manta rays: Do elasmobranchs have self-awareness? J Ethol 34: 167–174.
35. Stewart JD, Stevens GM, Marshall GJ, Abernathy K (2017) Are mantas self aware or  
780 simply social? A response to Ari and D’Agostino 2016. J Ethol 35: 145-147
36. Ari C, Laros K, Balcombe J, D’Agostino DP (2017) Understanding the behavior of manta  
782 rays: answer to a critique. J Ethol 35: 149-152.
37. Grutter AS (1999) Cleaner fish really do clean. Nature 398: 672-673.
- 784 38. [Bshary](#) R, Grutter AS (2006) Image scoring and cooperation in a cleaner fish mutualism.  
Nature 441: 975-978.
- 786 39. Bshary R (2002) Biting cleaner fish use altruism to deceive image-scoring client reef fish.  
Proc R Soc Lond 269: 2087-2093.
- 788 40. Bshary R, Grutter AS (2005) Punishment and partner switching cause cooperative  
behaviour in a cleaning mutualism. Biol Lett 1: 396-399.
- 790 41. Bshary R, Würth M (2001) Cleaner fish *Labroides dimidiatus* manipulate client reef fish  
by providing tactile stimulation. Proc Roy Soc B 268: DOI: 10.1098/rspb.2001.1495
- 792 42. Pinto A, Oates J, Grutter A, Bshary R (2011) Cleaner wrasses *Labroides dimidiatus* are

more cooperative in the presence of an audience. *Curr Biol* 21: 1140–1144.

- 794 43. Tebbich S, Bshary R, Grutter A (2002) Cleaner fish *Labroides dimidiatus* recognise  
familiar clients. *Anim Cogn* 5:139–145.
- 796 44. Braithwaite V (2010) *Do Fish Feel Pain?* Oxford: Oxford University Press.
45. Bshary R (2011) Machiavellian Intelligence in Fishes. In: C Brown, K Laland & J Krause  
798 (eds.) *Fish Cognition and Behaviour*, pp. 277-297.
46. Kuwamura T (1984) Social structure of the protogynous fish *Labroides dimidiatus*. *Publ*  
800 *Seto MarBiol Lab* 29:117-177.
47. Losey GS, Grutter A, Rosenquist G, Mahon JL, Zamzow J (1999) Cleaning symbiosis: a  
802 review. In: Almada VC, Oliveira RF, Goncalves EJ, editors, *Behaviour and conservation of*  
*littoral fishes*. ISPA, Lisboa, pp. 379–395.
- 804 48. Wyman RL, Wyman MFW (1985) [Chafing in fishes: occurrence, ontogeny, function and](#)  
[evolution](#). *Environ Biol Fish* 12: 281-289.
- 806 49. Berthe C, Lecchini D, Mourier J (2016) Chafing behavior on a patch of sandy bottom by  
ocellated eagle ray (*Aetobatus ocellatus*). *Mar Biodiv*. DOI 10.1007/s12526-016-0463-8
- 808 50. Baragli P, Demuru E, Scopa C, Palagi E (2017) Are horses capable of mirror self-  
recognition? A pilot study. *PLoS ONE* 12: e0176717.
- 810 51. Olsen EM, Vollestad LA (2001) An evaluation of visible implant elastomer for marking  
age-0 brown trout. *Nor Am J Fish Manag* 21: 967-970.
- 812 52. Olsen EM, Vollestad LA (2004) Evaluation of the use of visible implant tags in age-0  
Atlantic cod. *Nor Am J Fish Manag* 24: 282-286.
- 814 53. Willis TJ, Babcock RC (1998) Retention and in situ detectability of visible implant  
fluorescent elastomer (VIFE) tags in *Pargus auratus* (Sparidae). *New Zealand J Mar*  
816 *Freshwater Res* 32: 247–254.
54. Frederick JL (1997) Evaluation of fluorescent elastomer injection as a method for  
818 marking small fish. *Bull Mar Sci* 61: 399–408.

55. Soler M, Pe´rez-Contreras T, Peralta-Sa´nchez JM (2014) Mirror-mark tests performed  
820 on Jackdaws reveal potential methodological problems in the use of stickers in avian mark-  
test studies. PLOS ONE 9: e86193.
- 822 56. Epstein R, Lanza RR, Skinner BF (1981) " Self-Awareness" in the Pigeon. Science 212:  
695-696.
- 824 57. Gallup GG Jr, Anderson JR, Platek SM (2011) Self-recognition. Gallagher S (ed) The  
Oxford handbook of the self. Oxford University Press, Oxford, pp 80-110.
- 826 58. Robertson DR (1972) Social control of sex reversal in a coral-reef fish. Science 177:  
1007-1009.
- 828 59. Balzarini V, Taborsky M, Wanner S, Koch F, Frommen JG (2014) Mirror, mirror on the  
wall: the predictive value of mirror tests for measuring aggression in fish. Behav Ecol  
830 Sociobiol 68: 871-878.
60. Desjardins JK, Fernald RD (2010) What do fish make of mirror images? Biol Lett 6: 744-  
832 747.
- 834
- 836
- 838
- 840
- 842
- 844
- 846

848

Table 1: Description of five types of atypical (mirror- or contingency-testing) behaviours

850 frequently observed during days 3–5 after presentation of the mirror.

(a) Dashing along the mirror: rapid dashing along the mirror surface in a single direction

852 for 10–30 cm. Fish did not swim directly against or make contact with their mirror reflection.

(b) Dashing along the mirror with the head in contact with the mirror: the head of the fish

854 was always in contact with the mirror during dashing.

(c) Dashing and stopping: fish rapidly dashed towards the mirror reflection but stopped

856 before contact with the mirror.

(d) Upside-down approach: fish swam in an upside-down posture while approaching the

858 mirror.

(e) Quick dance: fish spread all of their fins, and quickly arched and quivered the body

860 several times during ca. 1 s at a distance 5–10 cm from the mirror; no dashing to the mirror was observed.

862

864

866

868

870

872

874



876 Table 2. Number of atypical (mirror-testing) behaviours shown by seven fish during the 20-  
 min observation period in the first 5 days after presenting the mirror. See Table 1 for  
 878 description of the behaviours. (a): Dashing along the mirror, (b): Dashing with head in contact  
 with the mirror, (c): Dashing and stopping, (d): Upside-down approach, (e) Quick dance

| 880 | Fish  | Categories of mirror-testing behaviour |     |           |           |           | Total |
|-----|-------|----------------------------------------|-----|-----------|-----------|-----------|-------|
|     |       | (a)                                    | (b) | (c)       | (d)       | (e)       |       |
| 882 | #1    | 2                                      | 0   | 4         | <u>39</u> | 0         | 45    |
|     | #2    | 0                                      | 0   | <u>30</u> | 0         | 0         | 30    |
| 884 | #3    | <u>54</u>                              | 0   | 0         | 0         | 0         | 54    |
|     | #7    | 15                                     | 0   | 0         | 0         | <u>35</u> | 50    |
| 886 | #13   | <u>33</u>                              | 0   | 0         | 0         | 0         | 33    |
|     | #20   | <u>31</u>                              | 17  | 2         | 0         | 2         | 52    |
| 888 | #21   | 2                                      | 0   | 2         | 0         | <u>6</u>  | 10    |
|     | Total | 137                                    | 17  | 38        | 39        | 43        | 274   |

890 The most frequent mirror-testing behaviour of each fish is underlined.

892

894

896 Table 3. Comparison of time spent in postures in which the marked site was reflected  
 between experimental periods of the mark test. Statistical tests (Mann–Whitney *U* test) at the  
 898 level of the individual between E2 (no mark) and E3 (sham-mark), between E2 and E5  
 (coloured mark) and between E3 and E5. *P*-values, with the *U*-statistic in parentheses, are  
 900 shown.

| Fish | E2 vs. E3             | E2 vs. E5           | E3 vs. E5          |
|------|-----------------------|---------------------|--------------------|
| 902  | Throat mark           |                     |                    |
|      | #1                    | <u>0.04</u> * (5.5) | <u>0.004</u> (0.0) |
| 904  | #4                    | 0.27 (9.0)          | <u>0.004</u> (0.0) |
|      | #20                   | 0.47 (13.5)         | <u>0.020</u> (4.0) |
| 906  | #21                   | 0.08 (7.0)          | <u>0.043</u> (5.5) |
|      | Right-sided head mark |                     |                    |
| 908  | #2                    | 0.31 (9.5)          | 0.15 (14.5)        |
|      | #7                    | <u>0.01</u> * (0.0) | <u>0.004</u> (0.0) |
| 910  | Left-sided head mark  |                     |                    |
|      | #5                    | 0.71 (13.0)         | <u>0.004</u> (1.0) |
| 912  | #6                    | 0.31 (9.0)          | <u>0.011</u> (4.0) |

*P*-values < 0.05 are underlined.

914 \* Time in E2 > time in E3 in fish #1, but E2 < E3 in fish #7.

## 916 **Figure Legends**

918 **Fig. 1. Responses of cleaner wrasse to the mirror and to real fish during the 2-week**  
919 **period after the mirror was introduced into the experimental tank.** (A) Design of the  
920 experimental tank showing the mirror location. (B) Photograph of mouth-to-mouth fighting  
921 against a mirror reflection. (C) Change in social responses towards the mirror. Mean  $\pm$  SE for  
922 time spent mouth fighting (red), time spent within 5 cm of the mirror without being aggressive  
(blue), and frequency of mirror-testing behaviours/10 min (green). Superscript labels a, b and  
924 c denote statistical differences. C1: on the seven fish appearing in Table 2; C2: on the three  
fish #4, #5 and #6. Statistical results for daily changes in time spent mouth fighting, LMM,  $c_7^2$   
926 = 91.87,  $P < 0.0001$ ; time spent in front of the mirror, LMM,  $c_7^2 = 64.63$ ,  $P < 0.0001$ , and  
changes in the number of mirror-testing behaviours, GLMM,  $c_7^2 = 137.08$ ,  $P < 0.0001$ . (D)  
928 Change in social responses to live conspecific fish over 2 weeks: Statistical results for daily  
changes in time spent mouth fighting, LMM,  $df = 7$ , chi-square = 27.36,  $P = 0.0003$ , and time  
930 spent in front of the mirror, LMM,  $df = 7$ , chi-square = 9.09,  $P = 0.25$ ; no idiosyncratic  
behaviours were observed in any fish in this condition. Symbols are as in (C).

932

## **Fig. 2. Mark locations and time spent in a posture allowing viewing of the marked site.**

934 (A) Marked location on the left side of the head (left) and under the throat (right); (B)  
Postures performed in front of the mirror: (a) displaying right side to mirror, (b) displaying left  
936 side to mirror, (c) vertical posture displaying throat, and (d) frontal-vertical posture. (C)  
Duration of each posture performed in the mirror for each individual: fish marked on the right  
938 side of the head (yellow,  $n = 2$ ), left side of the head (blue,  $n = 2$ ), and throat (red,  $n = 4$ )  
during periods E2 (control: no mark), E3 (sham-mark) and E5 (coloured mark with mirror).  
940 (C-a): Time spent viewing the marked location (i.e. the correct side): Repeated-measures  
ANOVA, main effect of sequences:  $F = 12.09$ ,  $P = 0.016$ , marked position:  $F = 19.06$ ,  $P =$   
942  $0.005$ , sequence  $\times$  marked position:  $F = 0.70$ ,  $P = 0.54$ . \*  $< 0.05$ , ns = not significant ( $n = 8$ )  
(C-b): Time spent viewing unmarked positions. Repeated-measures ANOVA, sequence:  $F =$

944 2.54,  $P = 0.12$ , marked position:  $F = 13.15$ ,  $P = 0.0008$ , sequence  $\times$  marked position:  $F =$   
946 0.99,  $P = 0.42$ . The posture allowing head viewing was performed more frequently than the  
vertical posture, because vertical swimming is rare in this species.

948

**Fig. 3. Throat scraping behaviour (self-directed behaviour) and its pattern of**

950 **occurrence.** (A) Frame-by-frame example of throat scraping behaviour. (B) Frequency of  
throat scraping behaviour of the four throat-marked fish during periods E2, E3, E4 and E5.  
952 (C) Schematic sequence of throat scraping behaviour including viewing, and then reviewing,  
the throat (before and after scraping, respectively).

954

956

958

960

**A**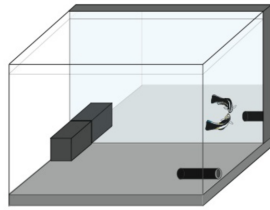

Experiment tank and camera

**B**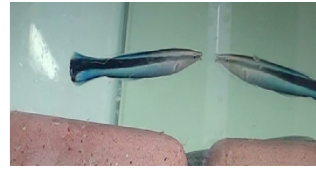

Mouth fight

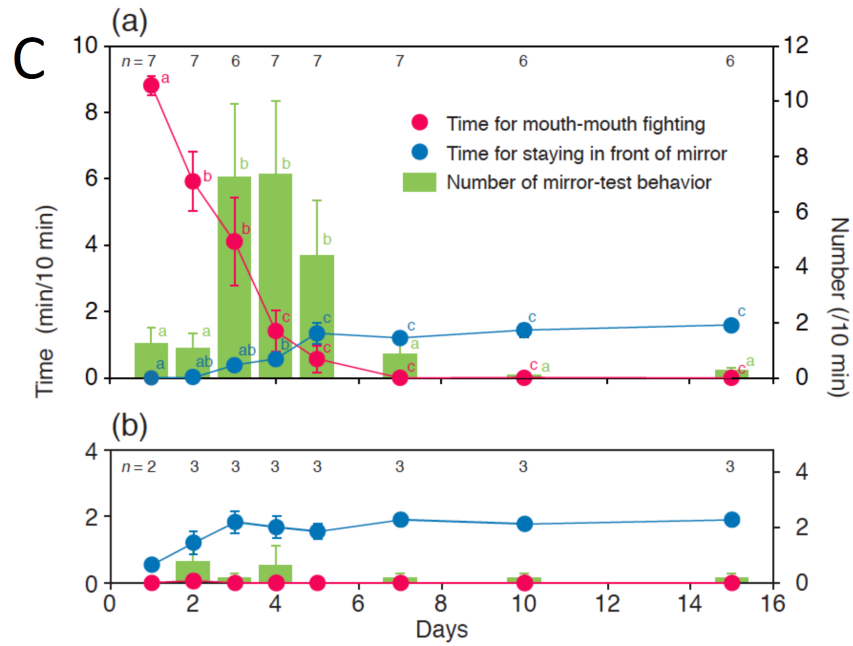**D**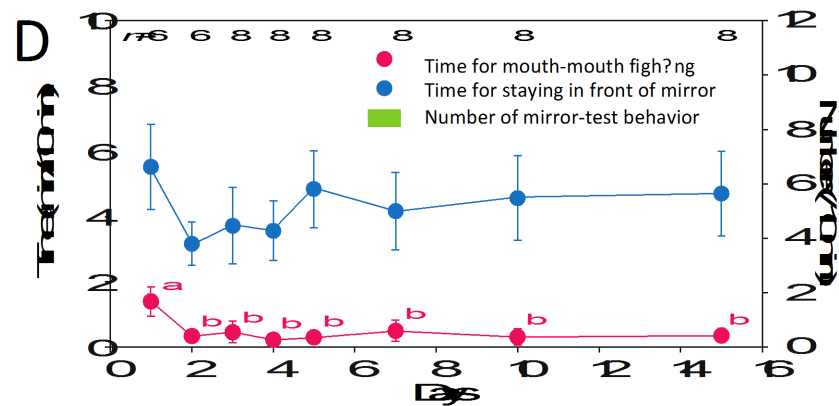

**A**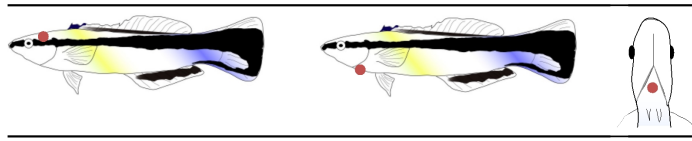**B**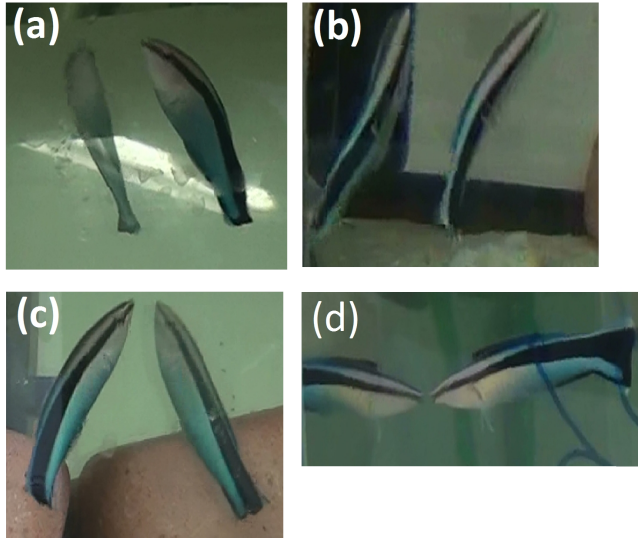**C**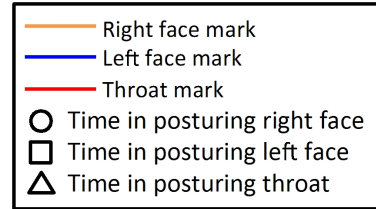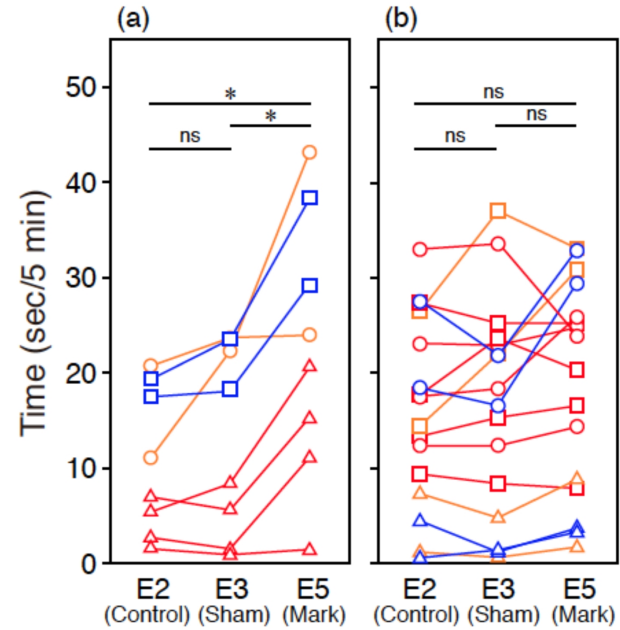

Figure 2.

A

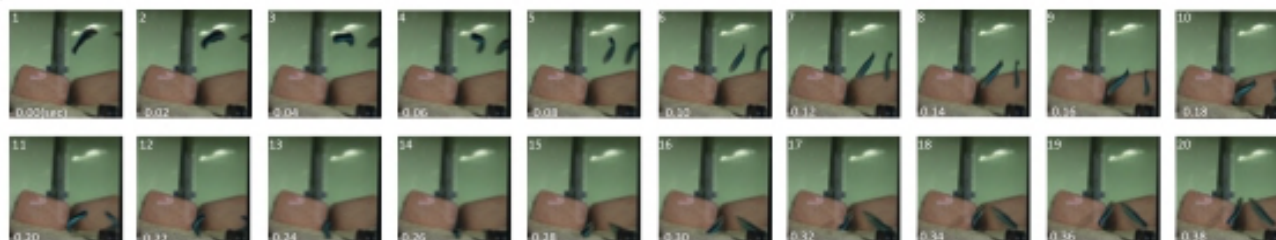

B

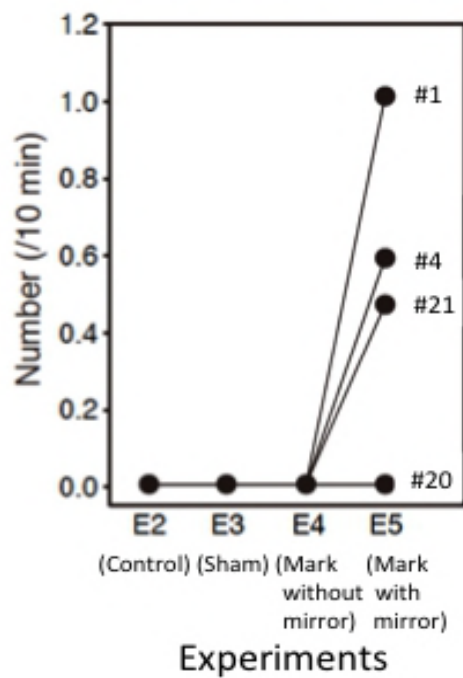

C

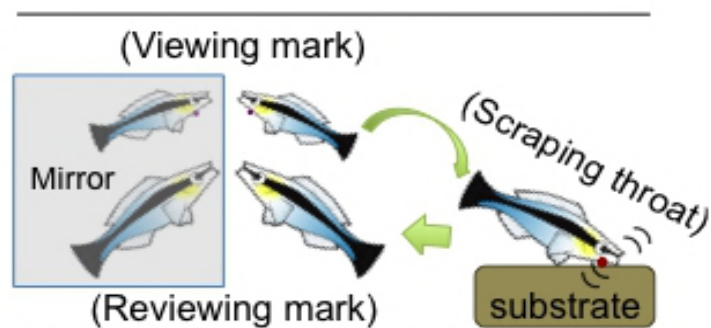

Figure 3.
